# Supplementary material
Source: PubMed Central journal article supplement (PMC6331287)
Supplement: NIHMS1516693-supplement-1.pdf [file NIHMS1516693-supplement-1.pdf]

A

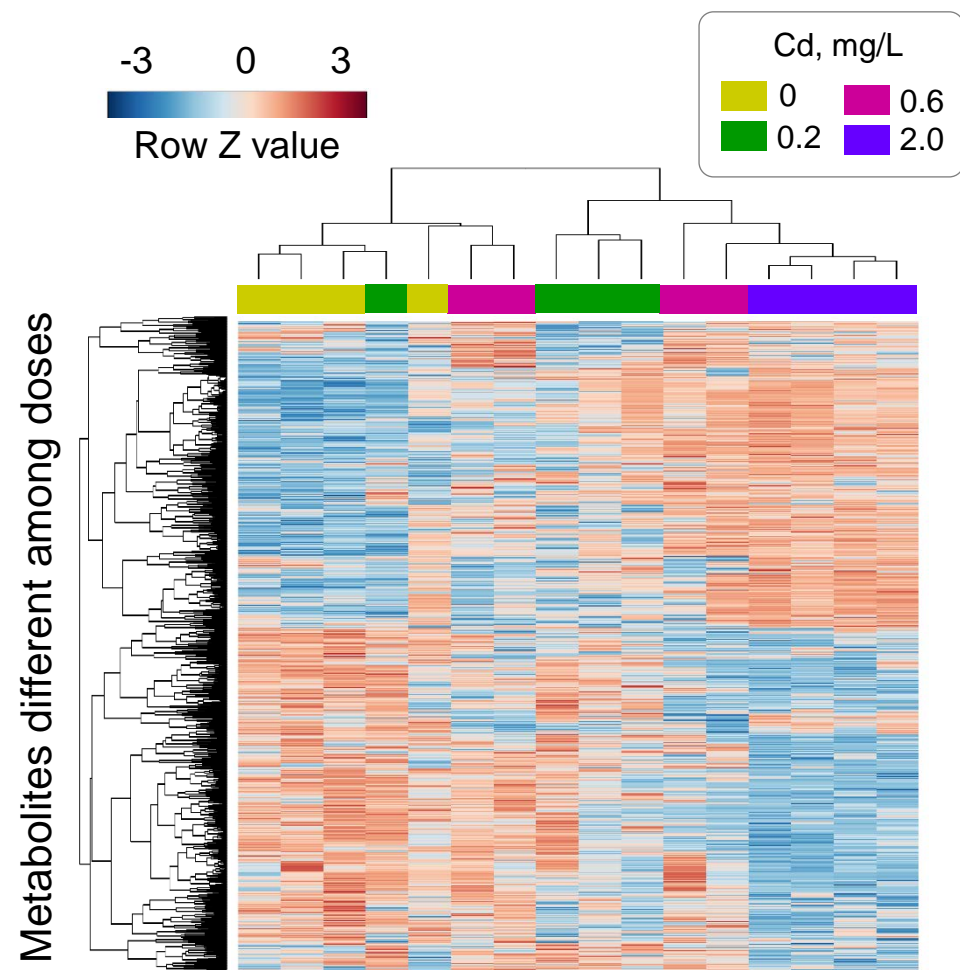

B

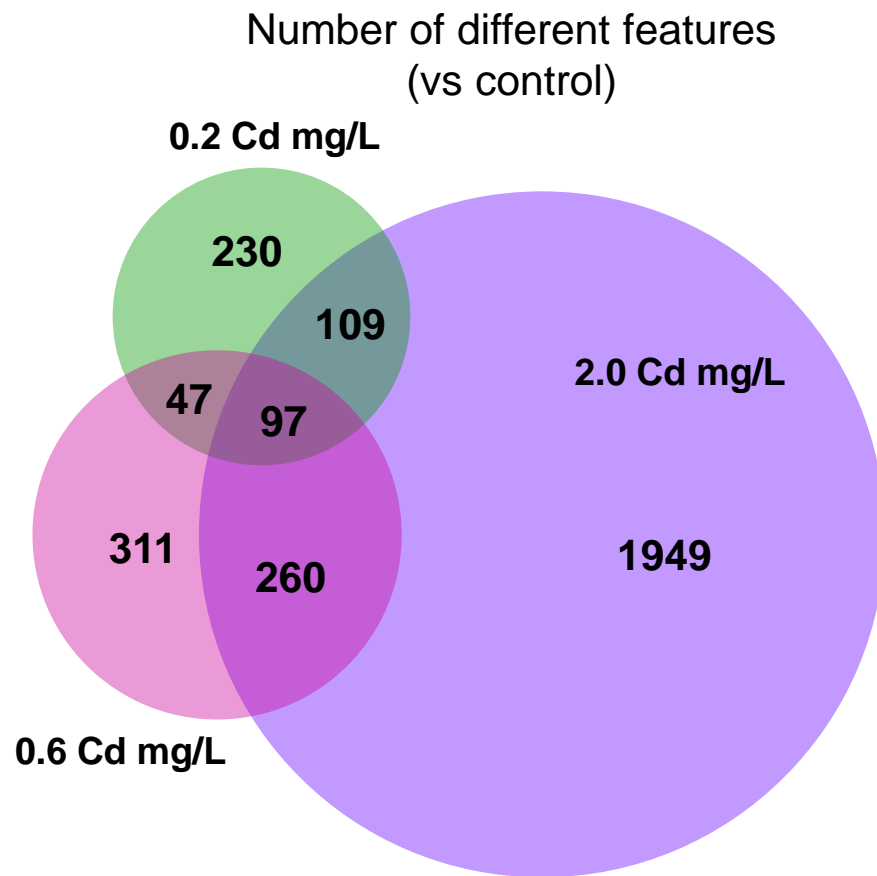

**Supplemental Fig. 1.** Lung metabolic features that differed among animals exposed to control or increasing doses of Cd (limma test,  $P < 0.05$ ) showed distinct profile in 2 mg/L Cd treated mouse lung by two-way unsupervised hierarchical clustering analysis (A), and the number of different features at 2 mg/L Cd dose in comparison to control (B).
