# Supplementary material
Source: PubMed Central journal article supplement (PMC6331287)
Supplement: NIHMS1516693-supplement-2.pdf [file NIHMS1516693-supplement-2.pdf]

**A**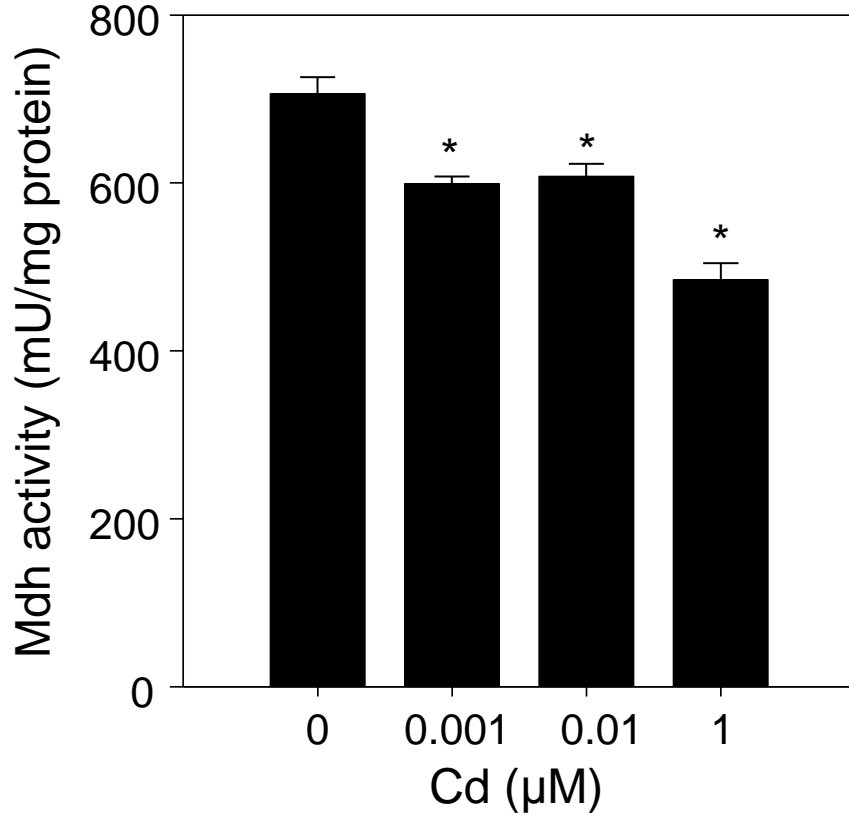**B**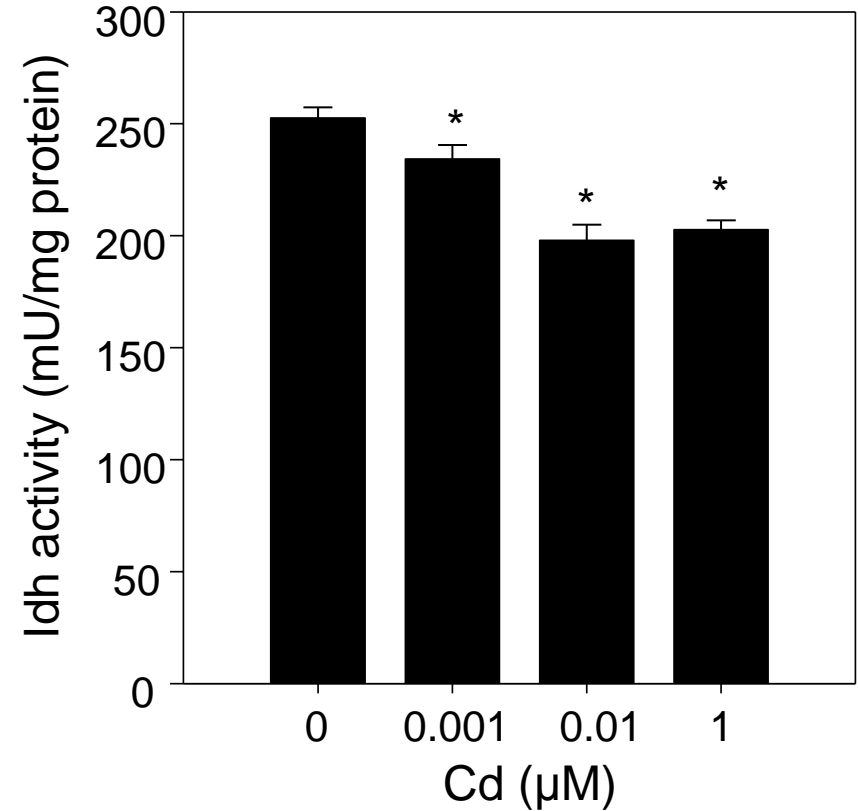

**Supplemental Fig. 2.** Activity of malate dehydrogenase (A, Mdh) and isocitrate dehydrogenase (B, Idh) in response to low doses of Cd treatment (0, 0.001, 0.01, 1 μM) was measured in isolated mouse lung mitochondria. Values expressed as mean  $\pm$  SE. Asterisk indicate significant difference from control (student's t test,  $P < 0.05$ ).
